# Supplementary material for: Novel insights into the unique intrinsic sensing behaviors of 2D nanomaterials for volatile organic compounds: from graphene to MoS2 and black phosphorous
Source: Royal Society of Chemistry journal article supplement (doi:10.1039/d1ta02383g), 2021-01-01
Supplement: d1ta02383g1.pdf [file d1ta02383g1.pdf]

## **Novel insights into the unique intrinsic sensing behaviors of 2D nanomaterials for volatile organic compounds: from graphene to MoS<sub>2</sub> and black phosphorous**

Boyang Zong,<sup>a</sup> Qikun Xu,<sup>a</sup> Qiuju Li,<sup>a</sup> Xian Fang,<sup>a</sup> Xiaoyan Chen,<sup>a</sup> Chengbin Liu,<sup>a</sup>  
Jianbin Zang,<sup>b</sup> Zheng Bo,<sup>c</sup> and Shun Mao<sup>\*a</sup>

<sup>a</sup> College of Environmental Science and Engineering, Biomedical Multidisciplinary Innovation Research Institute, Shanghai East Hospital, State Key Laboratory of Pollution Control and Resource Reuse, Tongji University, 1239 Siping Road, Shanghai 200092, China

<sup>b</sup> School of Mechanical Engineering, Tongji University, 1239 Siping Road, Shanghai 200092, China

<sup>c</sup> State Key Laboratory of Clean Energy Utilization, College of Energy Engineering, Hangzhou Global Scientific and Technological Innovation Center, Zhejiang University, Hangzhou, Zhejiang Province 310027, China

\*E-mail: shunmao@tongji.edu.cn (S. M.)

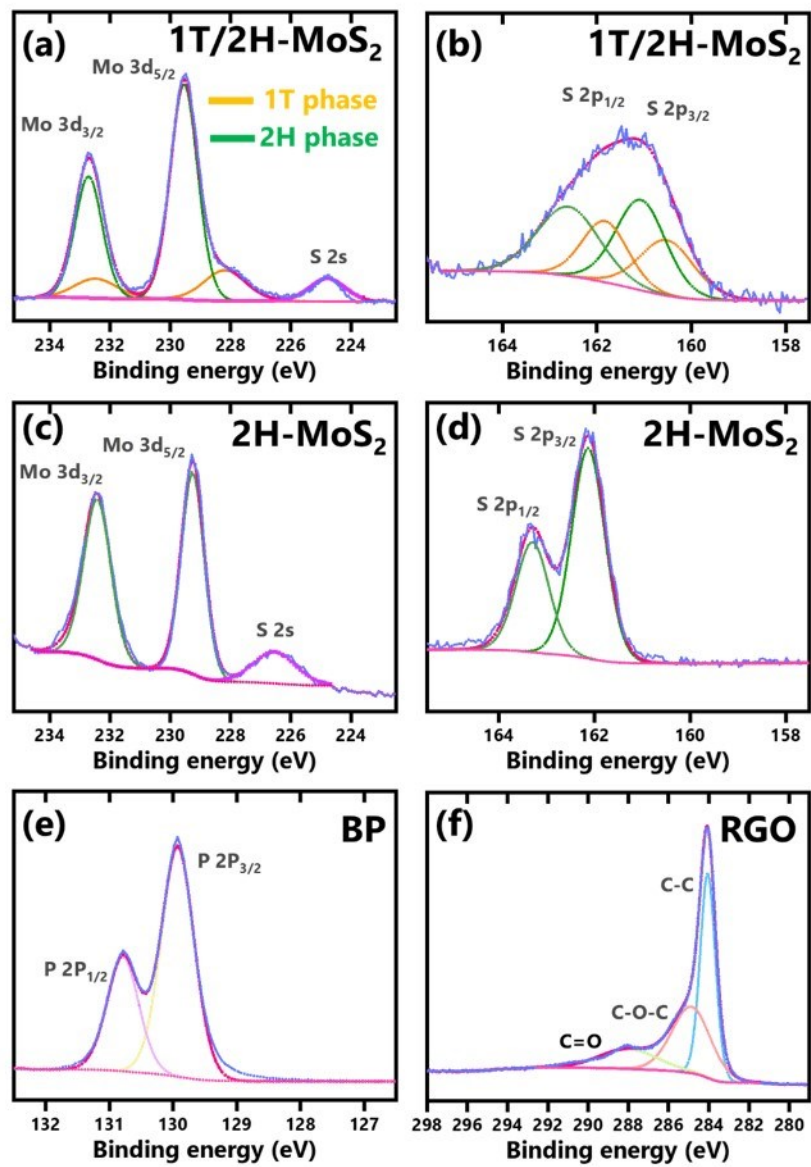

**Figure S1** XPS spectra of (a)-(b) 1T/2H-MoS<sub>2</sub>, (c)- (d) 2H-MoS<sub>2</sub>, (e) BP, and (f) RGO. The orange and green line represents 1T and 2H phase of MoS<sub>2</sub>, respectively.

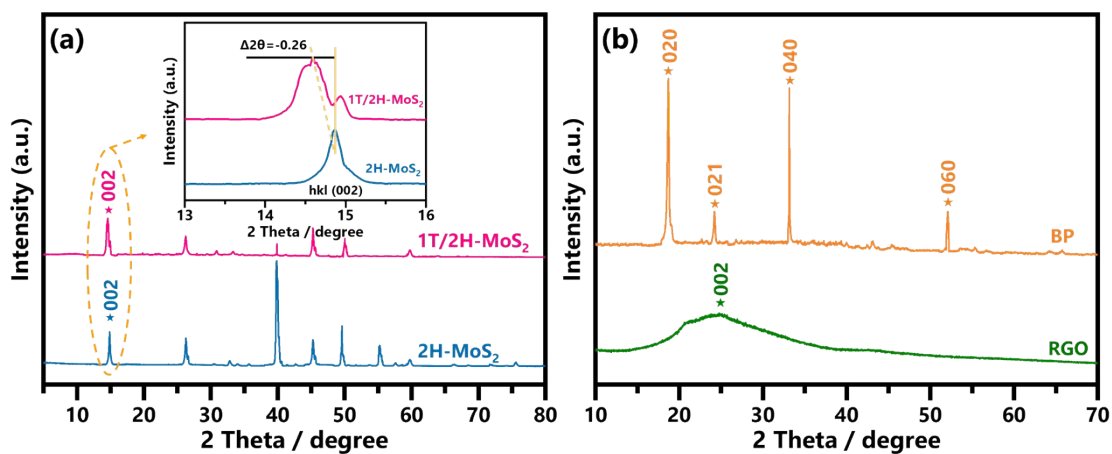

**Figure S2** XRD patterns of (a) 1T/2H-MoS<sub>2</sub> and 2H-MoS<sub>2</sub>, and (b) BP and RGO.

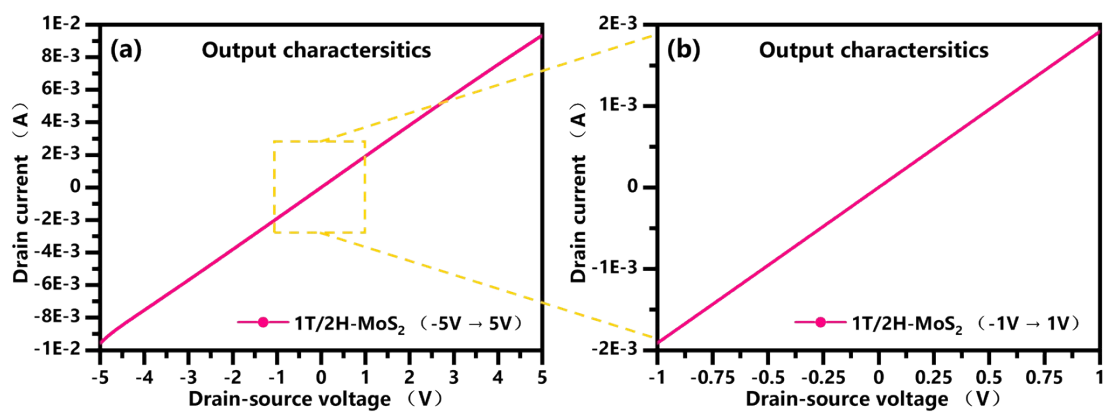

**Figure S3** Drain current ( $I_{ds}$ ) vs. source-drain voltage ( $V_{ds}$ ) for 1T/2H-MoS<sub>2</sub> with a voltage range of (a) -5 V to +5 V and (b) -1 V to +1 V, respectively.

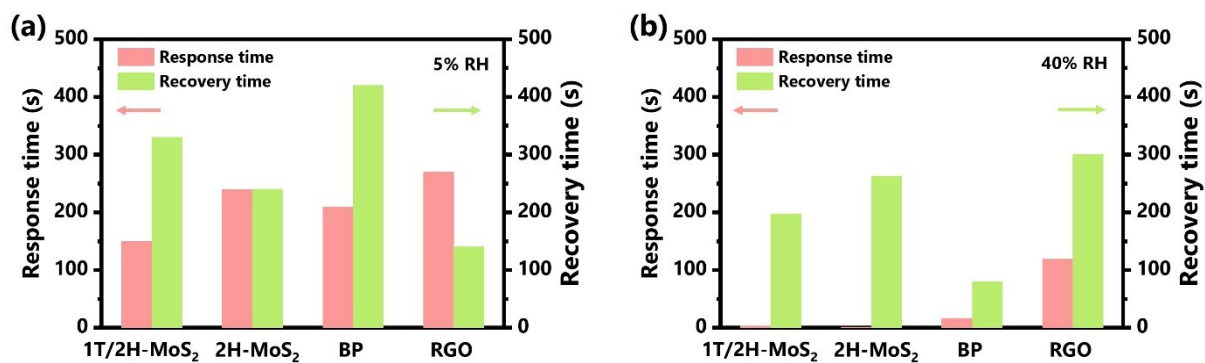

**Figure S4** Comparison of response and recovery times of 1T/2H-MoS<sub>2</sub>, 2H-MoS<sub>2</sub>, BP, and RGO sensor toward 1 ppm HCHO in dry air and under 40% RH.

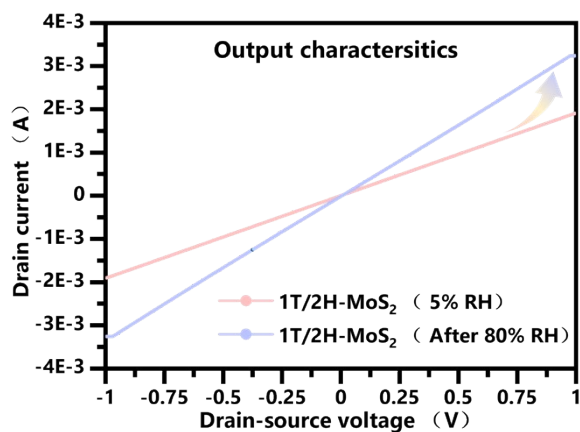

**Figure S5** The  $I_{ds}$ - $V_{ds}$  of 1T/2H-MoS<sub>2</sub> before and after sensing tests under humidity condition.

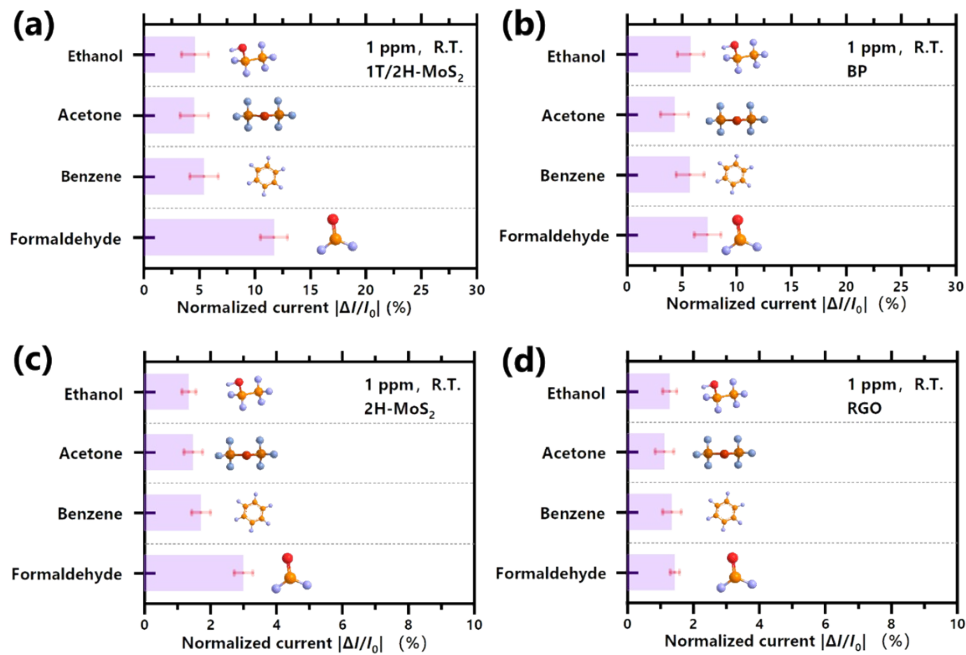

**Figure S6** Relative responses of the (a) 1T/2H-MoS<sub>2</sub>, (b) BP, (c) 2H-MoS<sub>2</sub> and (d) RGO FET sensors to different VOCs at 1 ppm.

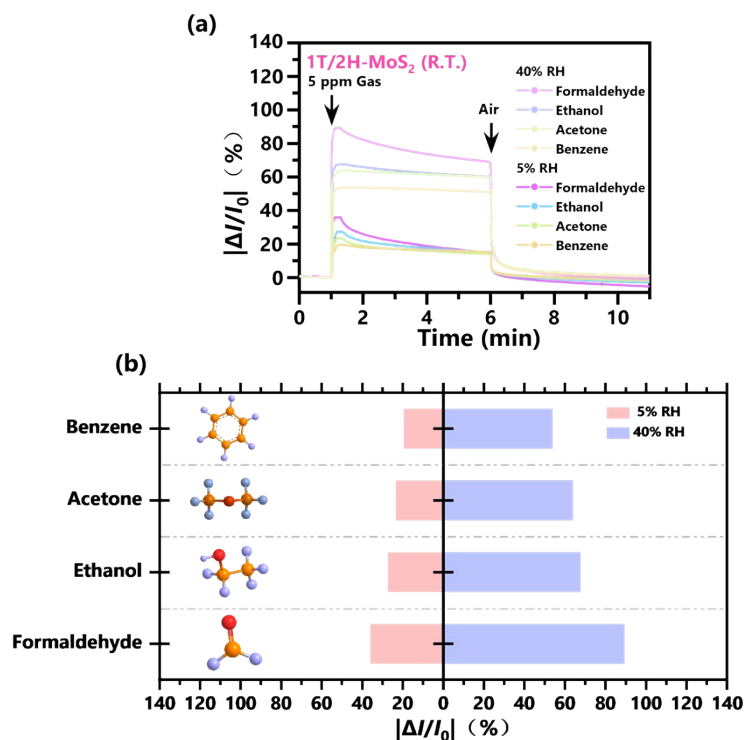

**Figure S7** (a) Gas sensing responses and (b) relative responses of 1T/2H-MoS<sub>2</sub> sensor to different VOCs at 5 ppm under 5% and 40% RH.

(a) 1T-MoS<sub>2</sub> → Formaldehyde - H terminate

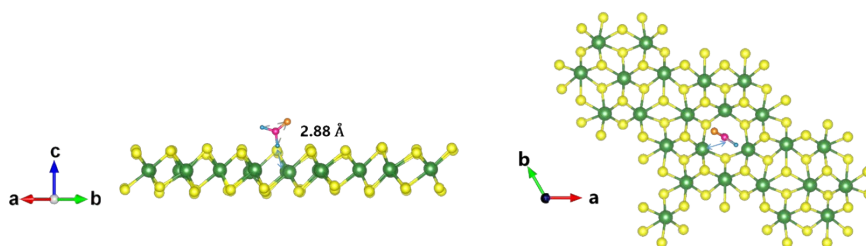

(b) 1T-MoS<sub>2</sub> → Formaldehyde - O terminate

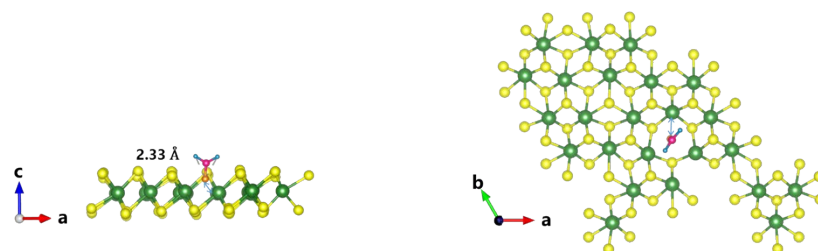

(c) 1T-MoS<sub>2</sub> → Ethanol - H terminate

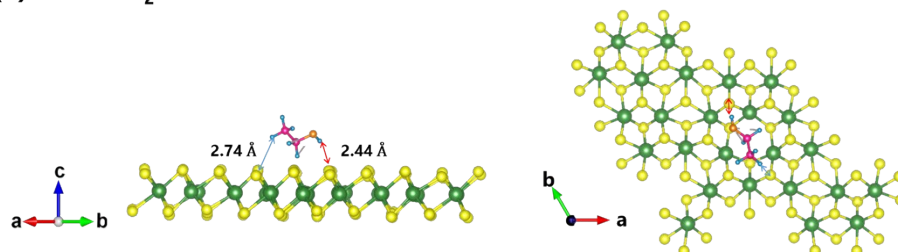

(d) 1T-MoS<sub>2</sub> → Ethanol - O terminate

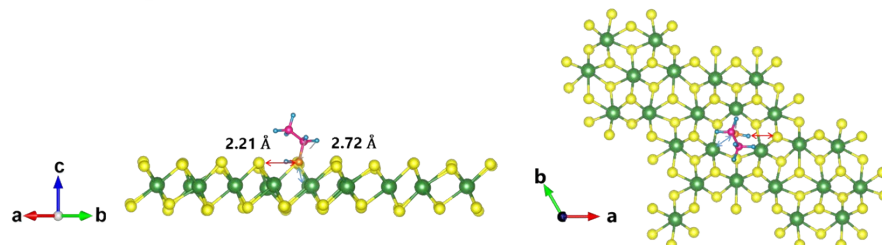

(e) 1T-MoS<sub>2</sub> → Acetone - H terminate

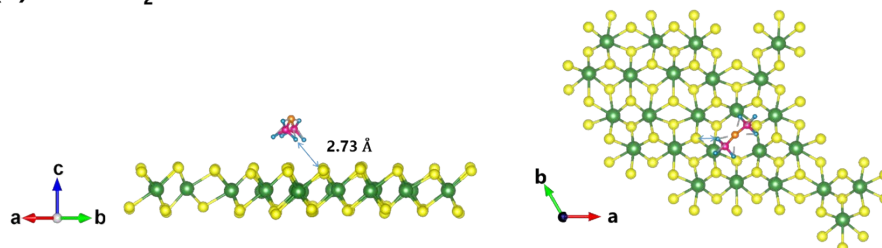

(f) 1T-MoS<sub>2</sub> → Acetone - O terminate

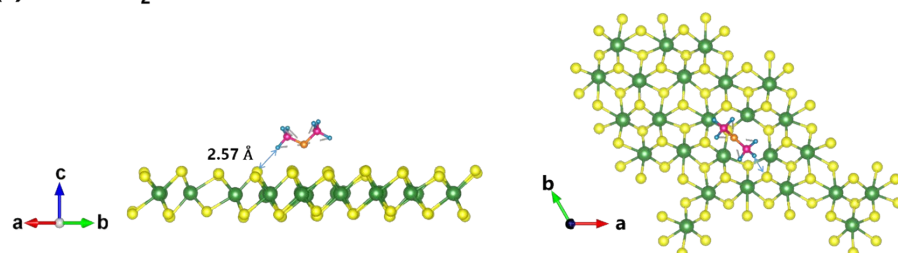

(g) 1T-MoS<sub>2</sub> → Benzene - H terminate

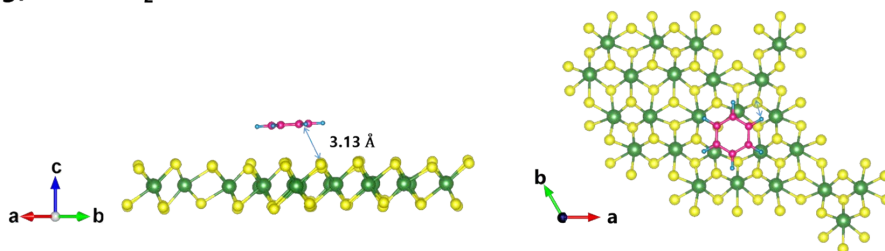

(h) 2H-MoS<sub>2</sub> → Formaldehyde - H terminate

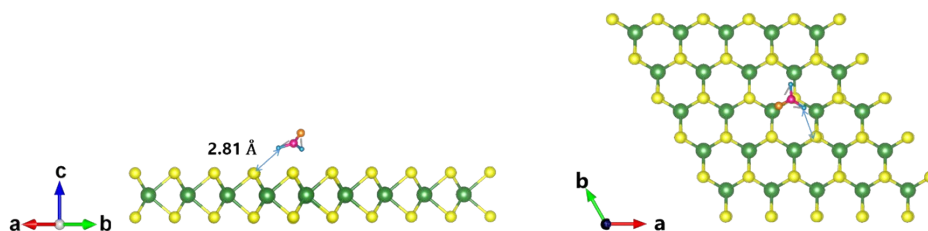

(i) 2H-MoS<sub>2</sub> → Formaldehyde - O terminate

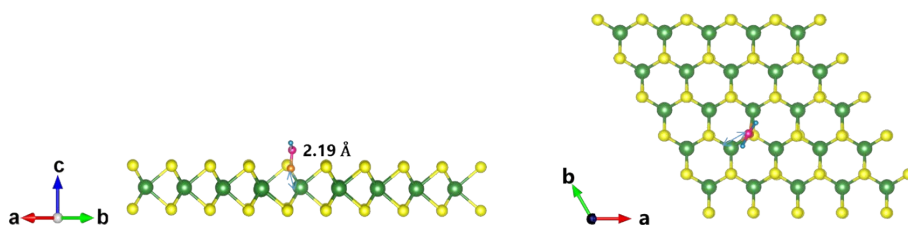

(j) 2H-MoS<sub>2</sub> → Ethanol - H terminate

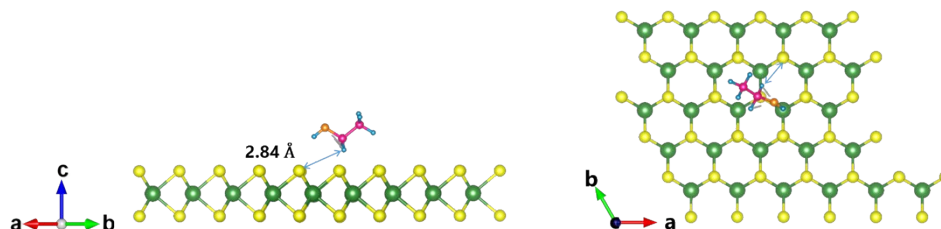

(k) 2H-MoS<sub>2</sub> → Ethanol - O terminate

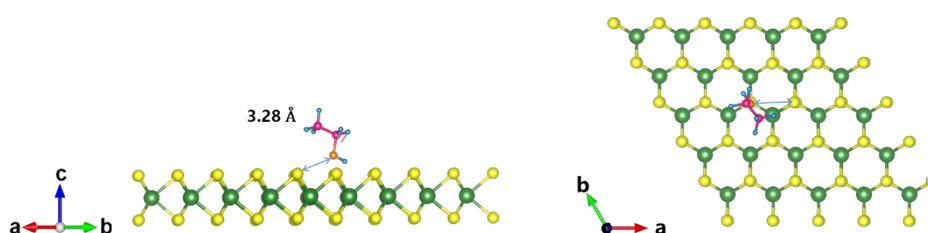

(l) 2H-MoS<sub>2</sub> → Acetone - H terminate

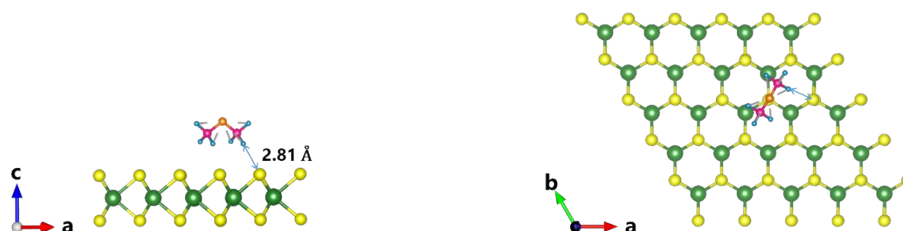

(m) 2H-MoS<sub>2</sub> → Acetone - O terminate

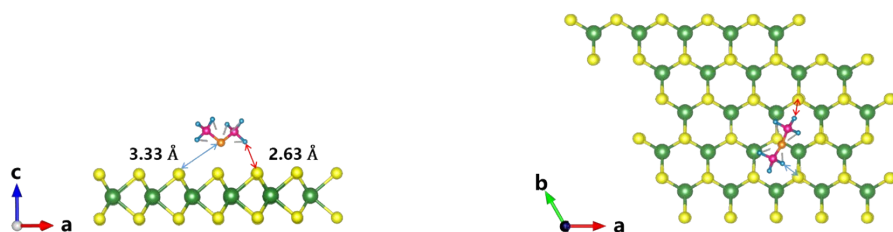

(n) 2H-MoS<sub>2</sub> → Benzene - H terminate

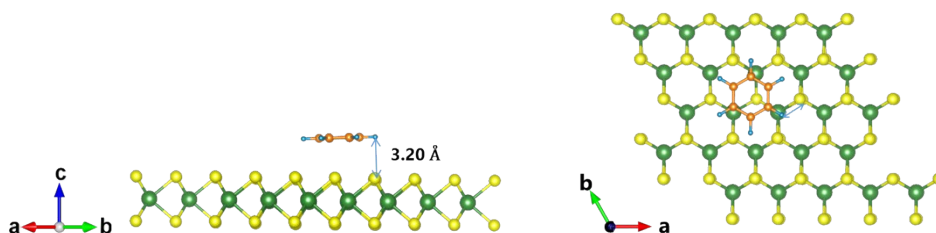

**Figure S8** Configurations of (a, b) formaldehyde, (c, d) ethanol, (e, f) acetone, (g, h) benzene gas molecule adsorbed with H terminate and O terminate, respectively, at the sulfur vacancy of 1T-MoS<sub>2</sub>. Configurations of (h, i) formaldehyde, (j, k) ethanol, (l, m) acetone, (n) benzene gas molecule adsorbed with H terminate and O terminate, respectively, at the sulfur vacancy of 2H-MoS<sub>2</sub>.

**Table S1** DFT calculation results of adsorption energy (eV) of formaldehyde, ethanol, acetone, benzene molecule with H atom or O atom as terminate on sulfur vacancy site on 1T-MoS<sub>2</sub> and 2H-MoS<sub>2</sub>. The “H” and “O” refer to the bonding approaches for analyte molecule adsorbed at the S vacancy that rely on H or O atom, respectively.

| Channel             | Formaldehyde- | Formaldehyde- | Ethanol- | Ethanol- | Acetone- | Acetone- | Benzene- |
|---------------------|---------------|---------------|----------|----------|----------|----------|----------|
|                     | H             | O             | H        | O        | H        | O        | H        |
| 1T-MoS <sub>2</sub> | -0.744        | -1.645        | -0.846   | -1.213   | -0.715   | -0.778   | -0.954   |
| 2H-MoS <sub>2</sub> | -0.287        | -0.557        | -0.381   | -0.386   | -0.325   | -0.329   | -0.568   |



(a) 1T-MoS<sub>2</sub>-H terminate

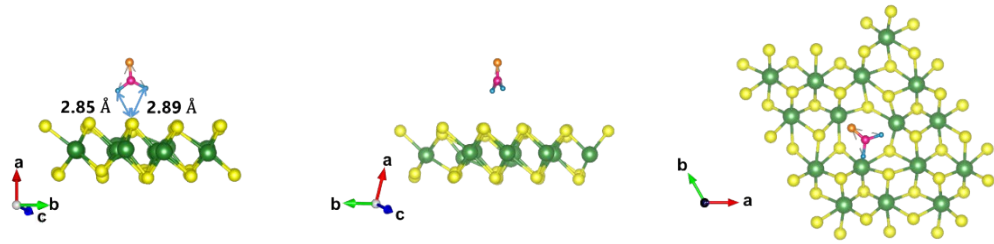

(b) 1T-MoS<sub>2</sub>-O terminate

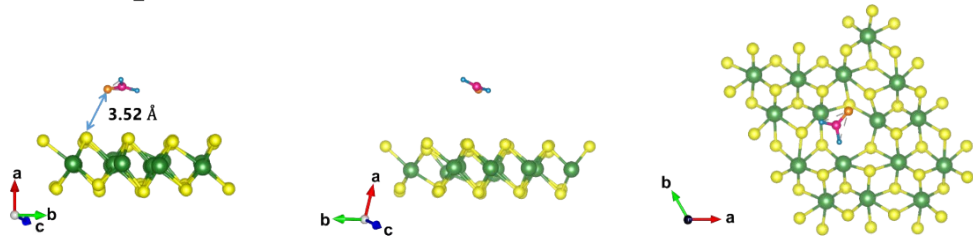

(c) 2H-MoS<sub>2</sub>-H terminate

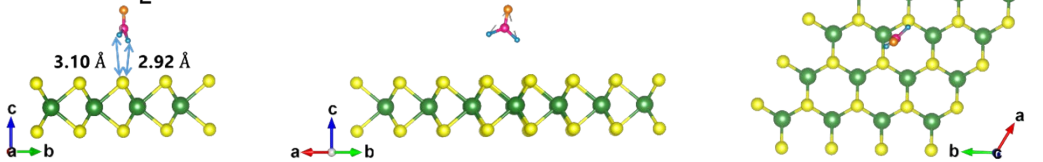

(d) 2H-MoS<sub>2</sub>-O terminate

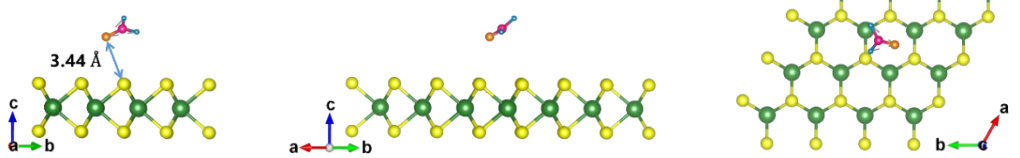

(e) BP-H terminate

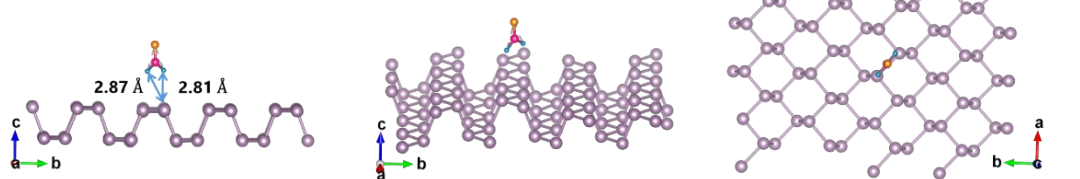

(f) BP-O terminate

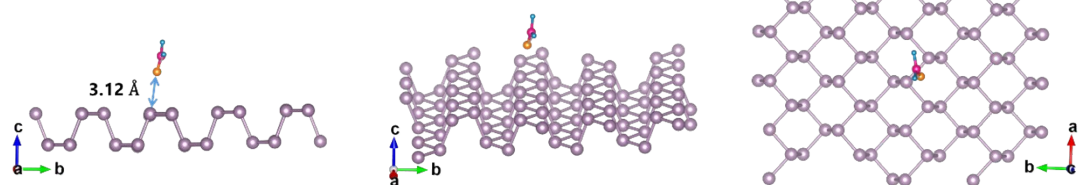

(g) RGO-H terminate

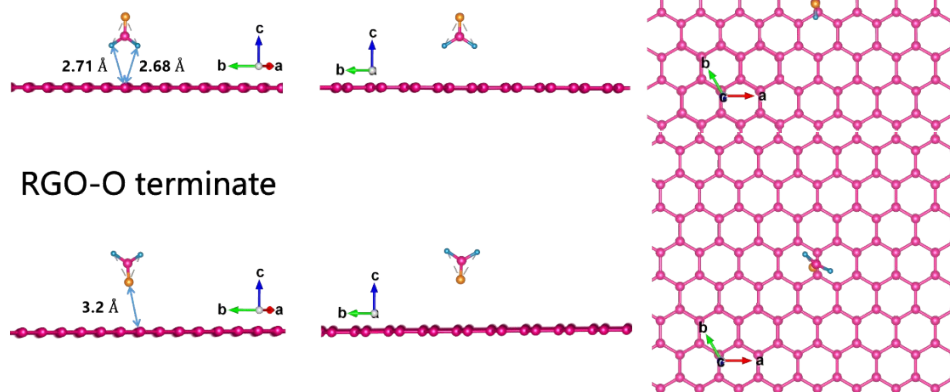

(h) RGO-O terminate

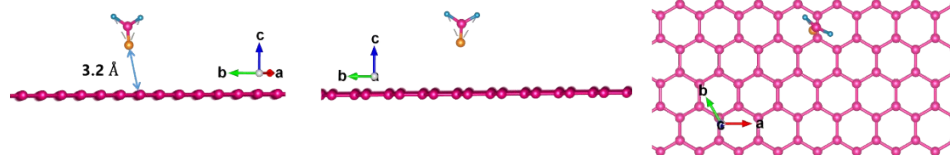

**Figure S9** Configurations of HCHO molecule adsorbed with H atoms as terminate at the basal plane of (a) 1T-MoS<sub>2</sub>, (c) 2H-MoS<sub>2</sub>, (e) BP, (g) RGO, and with O atom as terminate at the basal plane of (b) 1T-MoS<sub>2</sub>, (d) 2H-MoS<sub>2</sub>, (f) BP, (h) RGO.

(a) 1T-MoS<sub>2</sub> → Formaldehyde - H terminate (Humidity)

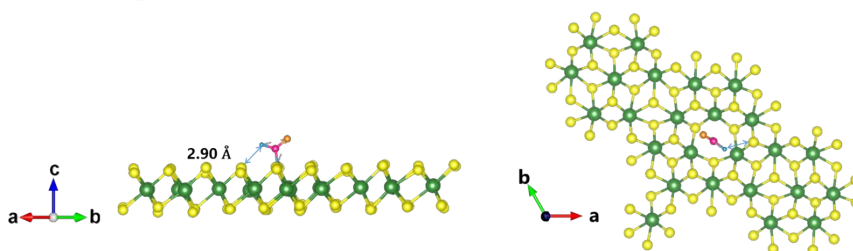

(b) 1T-MoS<sub>2</sub> → Formaldehyde - O terminate (Humidity)

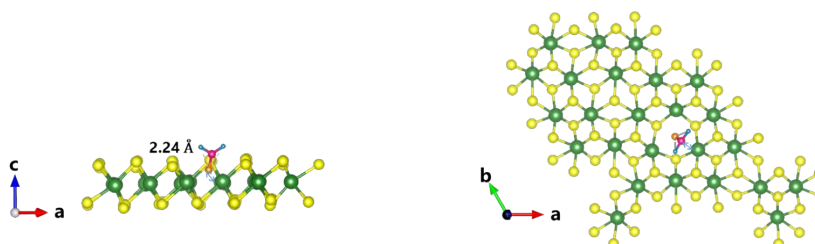

(c) 2H-MoS<sub>2</sub> → Formaldehyde - H terminate (Humidity)

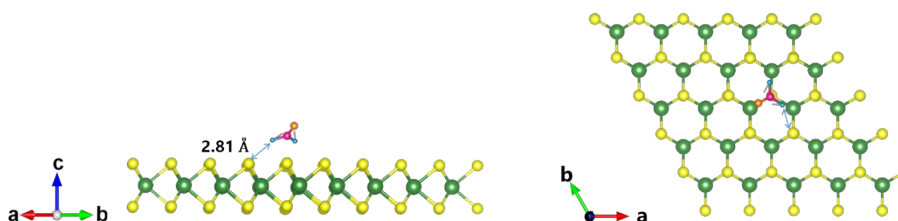

(d) 2H-MoS<sub>2</sub> → Formaldehyde - O terminate (Humidity)

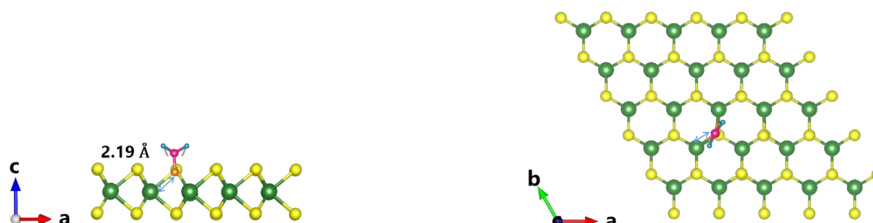

**Figure S10** Configurations of formaldehyde molecule adsorbed with H atoms as terminate at the sulfur vacancy of (a) 1T-MoS<sub>2</sub>, (c) 2H-MoS<sub>2</sub>; and with O atoms as terminate at the sulfur vacancy of (b) 1T-MoS<sub>2</sub>, (d) 2H-MoS<sub>2</sub> under humidity condition.

**Table S2** DFT calculation results of adsorption energy (eV) of formaldehyde molecule with H atom or O atom as terminate, respectively, on sulfur vacancy sites on 1T-MoS<sub>2</sub> and 2H-MoS<sub>2</sub> under humidity condition. The “H” and “O” refer to the bonding approaches for analyte molecule adsorbed at the S vacancy that rely on H or O atom, respectively.

| <b>Channel</b>            | <b>Formaldehyde-H (humidity)</b> | <b>Formaldehyde-O (humidity)</b> |
|---------------------------|----------------------------------|----------------------------------|
| <b>1T-MoS<sub>2</sub></b> | -0.864                           | -1.917                           |
| <b>2H-MoS<sub>2</sub></b> | -0.426                           | -0.609                           |
